# Supplementary material for: Unravelling the Carbon and Sulphur Metabolism in Coastal Soil Ecosystems Using Comparative Cultivation-Independent Genome-Level Characterisation of Microbial Communities
Source: PubMed Central journal article supplement (PMC4167329; doi:10.1371/journal.pone.0107025), 2014-09-16
Supplement: pone.0107025.s001.pdf [file pone.0107025.s001.pdf]

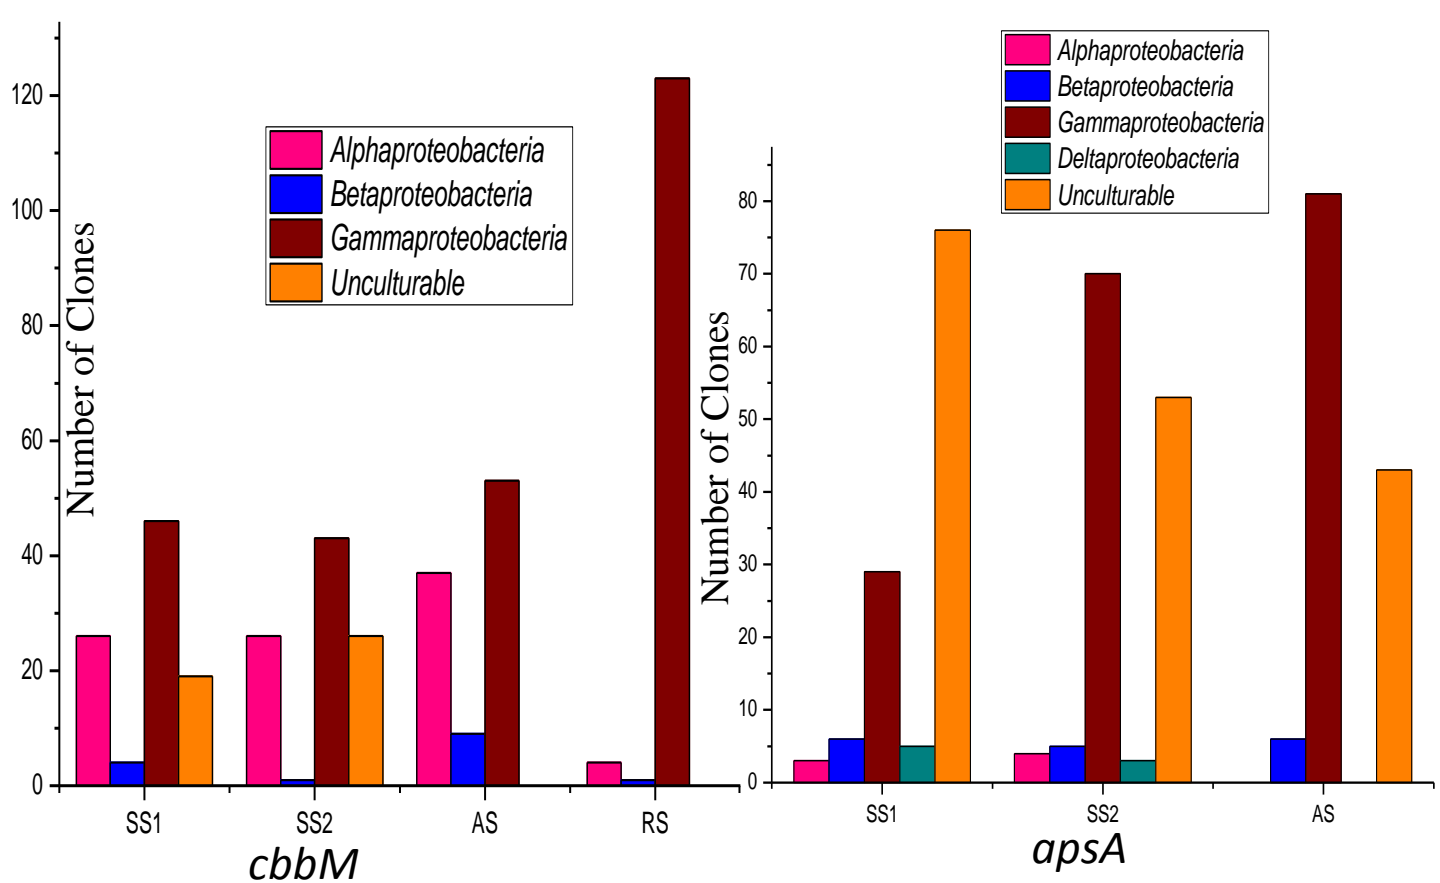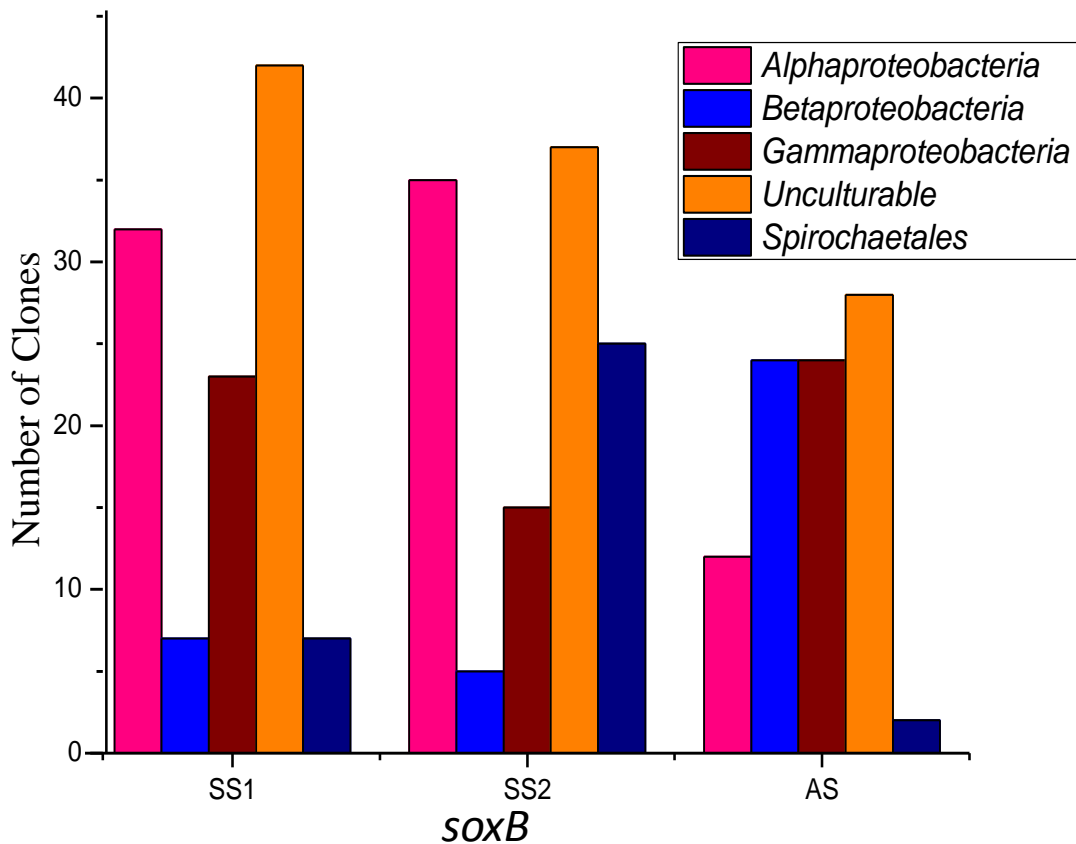

**Figure S1: Distribution of functional microbial groups across four different soil habitats**
