# Supplementary material for: Unravelling the Carbon and Sulphur Metabolism in Coastal Soil Ecosystems Using Comparative Cultivation-Independent Genome-Level Characterisation of Microbial Communities
Source: PubMed Central journal article supplement (PMC4167329; doi:10.1371/journal.pone.0107025), 2014-09-16
Supplement: pone.0107025.s002.pdf [file pone.0107025.s002.pdf]

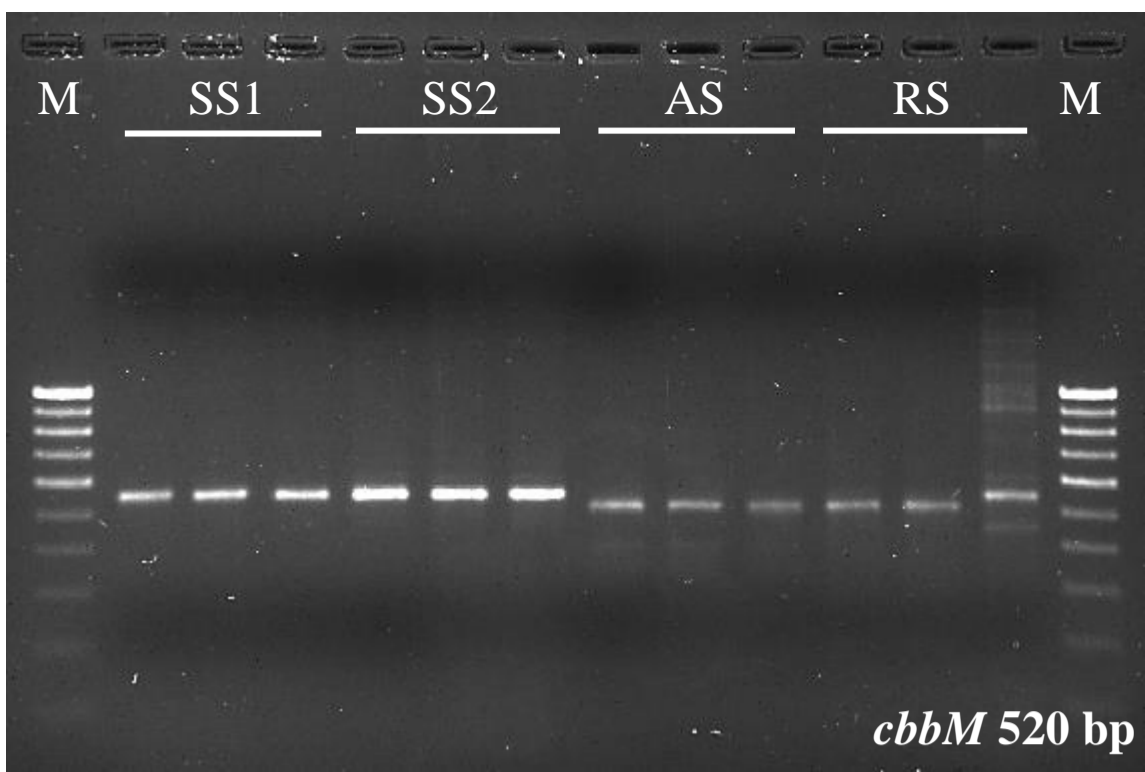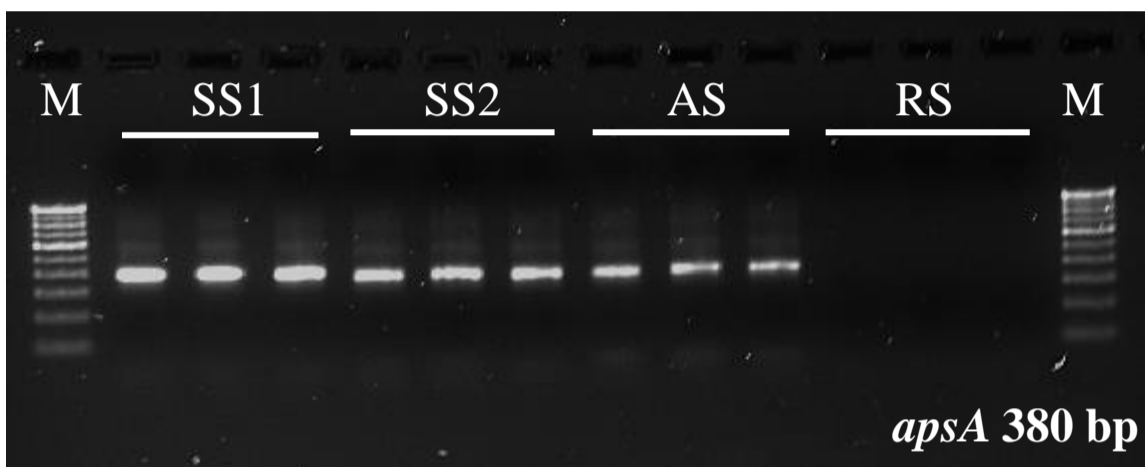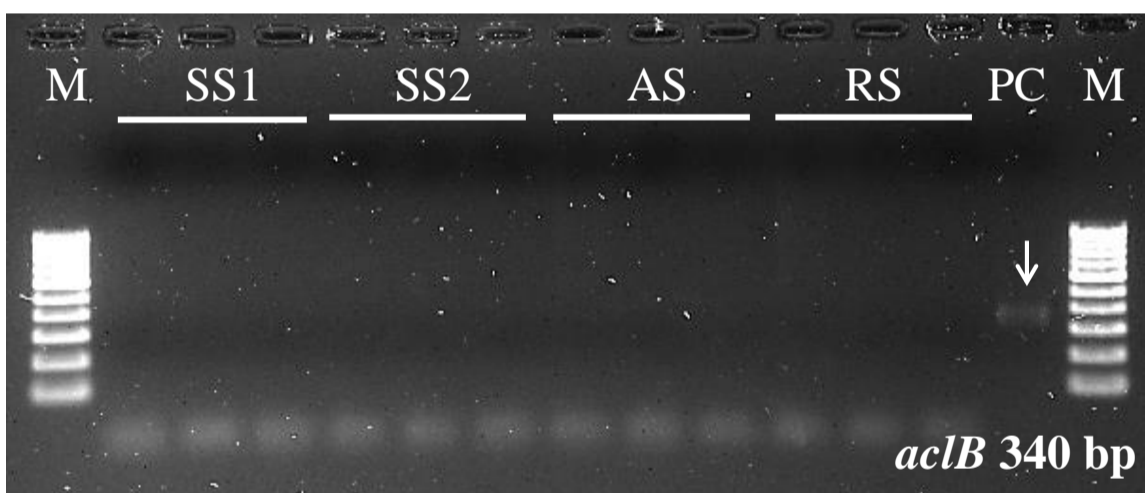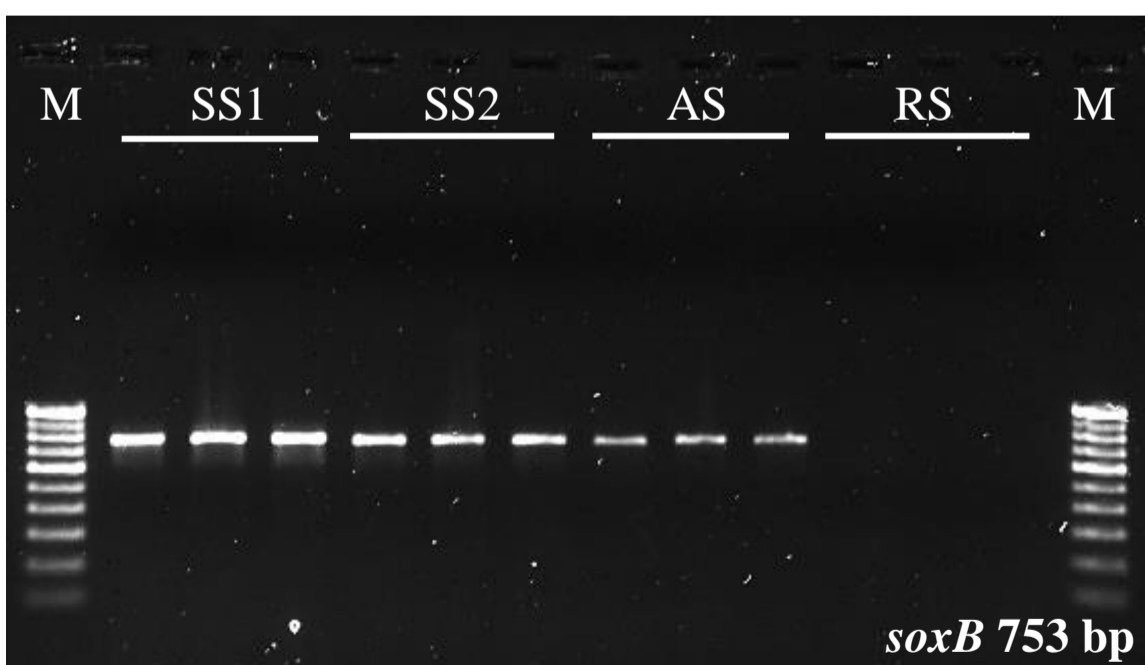

**Figure S2: PCR amplification of targeted functional genes.** PCR amplification of *cbbM*, *apsA*, *aclB* and *soxB*, using different soil DNA as template following their respective gene specific primers and PCR conditions (Table S1). M: Marker (100 bp DNA ladder); SS1, SS2, AS, and RS: Soil Samples; PC: Positive control
