# Supplementary material for: Unravelling the Carbon and Sulphur Metabolism in Coastal Soil Ecosystems Using Comparative Cultivation-Independent Genome-Level Characterisation of Microbial Communities
Source: PubMed Central journal article supplement (PMC4167329; doi:10.1371/journal.pone.0107025), 2014-09-16
Supplement: pone.0107025.s003.pdf [file pone.0107025.s003.pdf]

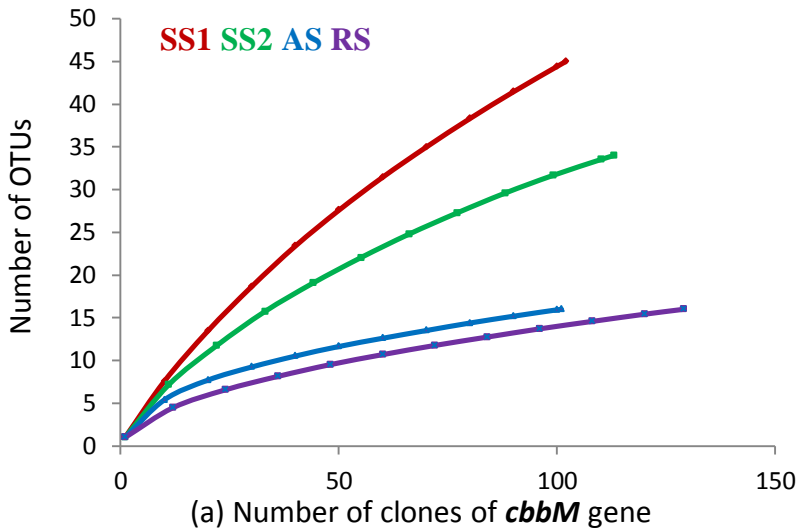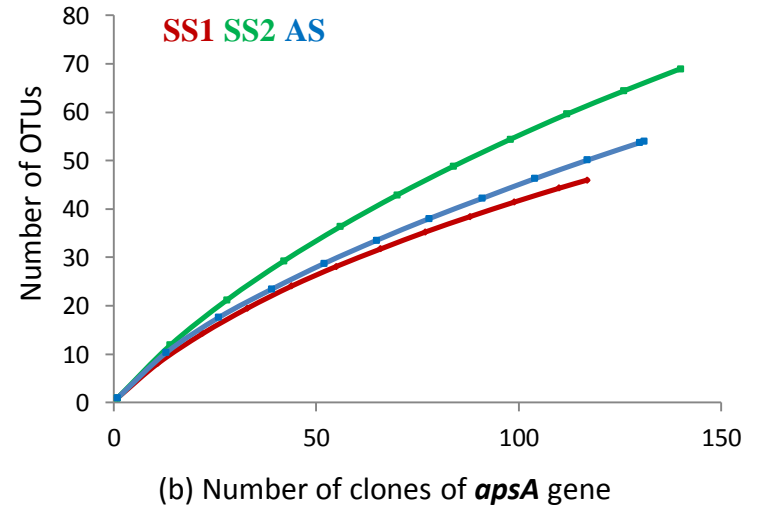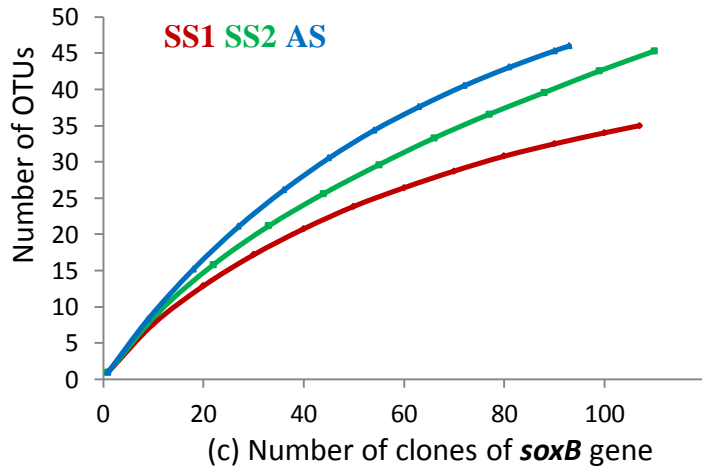

**Figure S3: Rarefaction curves for targeted functional genes clone library.** Rarefaction curves for (a) *cbbM* (b) *apsA* and (c) *soxB* gene clone libraries at 0.05 cut-off. Bacterial richness in SS1, SS2, AS and RS soils is indicated by slopes of the rarefaction curves.
