# Supplementary material for: Unravelling the Carbon and Sulphur Metabolism in Coastal Soil Ecosystems Using Comparative Cultivation-Independent Genome-Level Characterisation of Microbial Communities
Source: PubMed Central journal article supplement (PMC4167329; doi:10.1371/journal.pone.0107025), 2014-09-16
Supplement: pone.0107025.s004.pdf [file pone.0107025.s004.pdf]

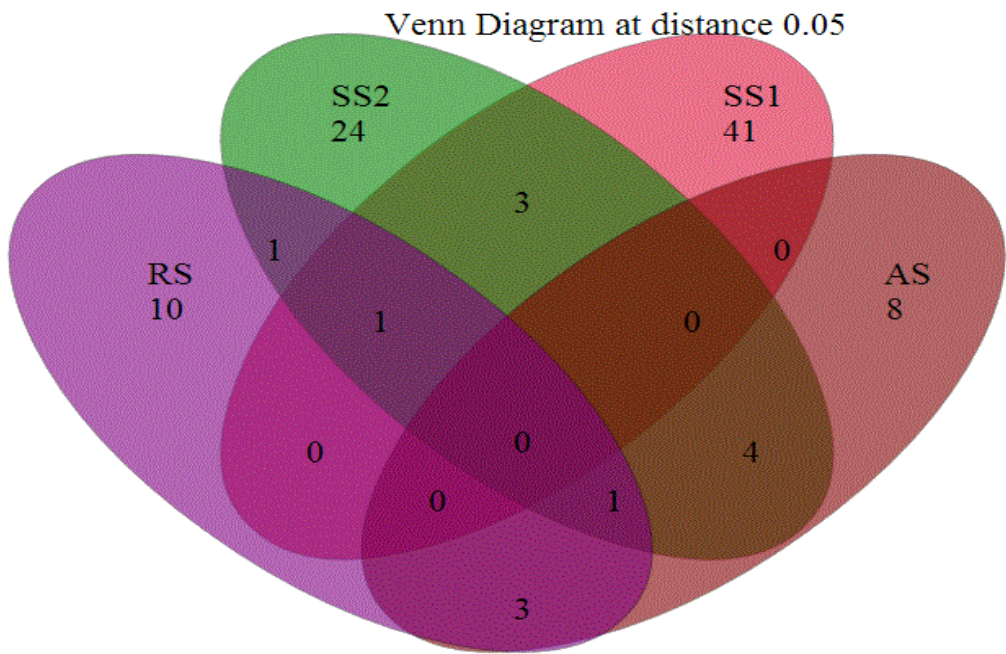

(a) *cbbM*

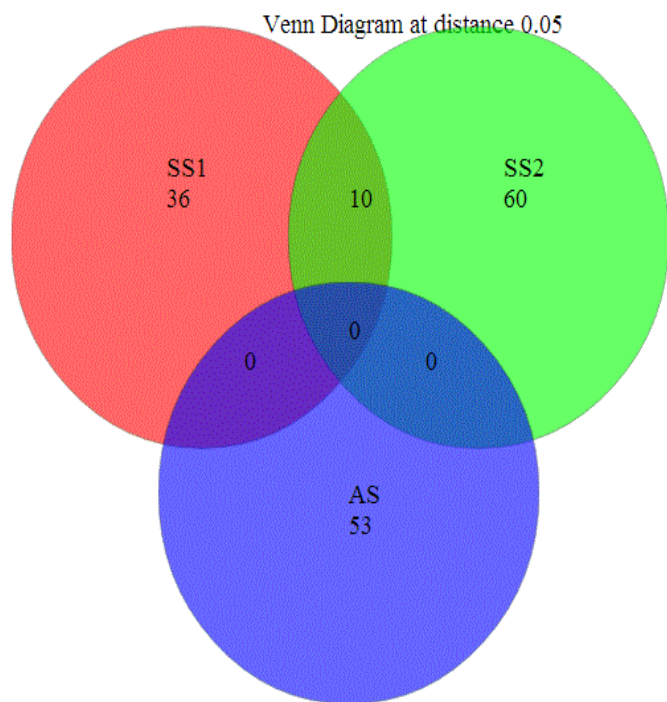

(b) *apsA*

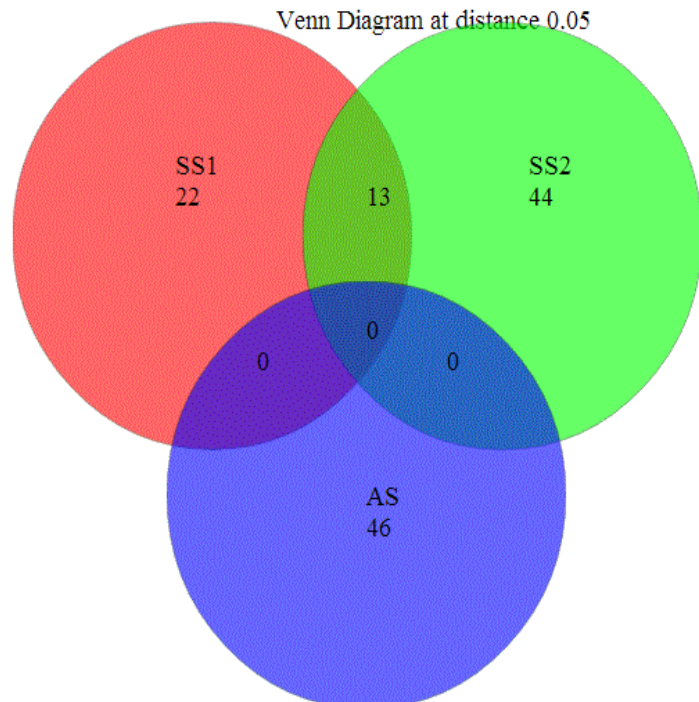

(c) *soxB*

**Figure S4:** Venn diagrams representing the observed overlap of OTUs for (a) *cbbM*, (b) *apsA* and (c) *soxB* gene libraries (distance = 0.05). Venn diagrams show overall overlap of representative genera between soils. The values in the diagram represent the number of genera that were taxonomically classified.
