# Supplementary material for: Unravelling the Carbon and Sulphur Metabolism in Coastal Soil Ecosystems Using Comparative Cultivation-Independent Genome-Level Characterisation of Microbial Communities
Source: PubMed Central journal article supplement (PMC4167329; doi:10.1371/journal.pone.0107025), 2014-09-16
Supplement: pone.0107025.s005.pdf [file pone.0107025.s005.pdf]

(a) *cbbM*

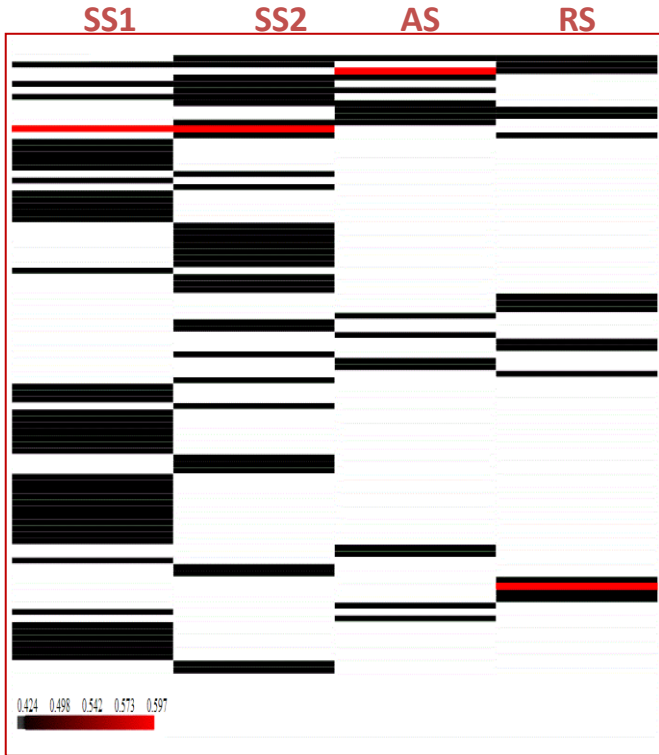

(b) *apsA*

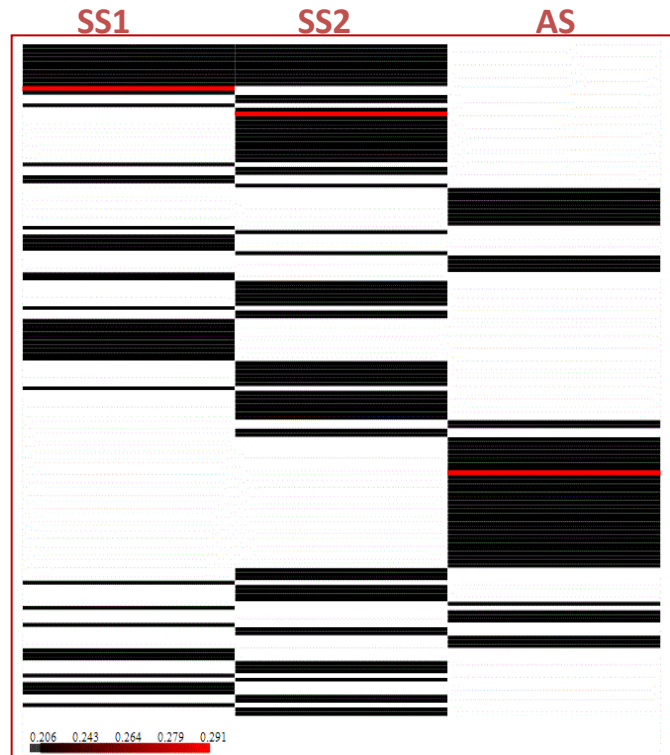

(c) *soxB*

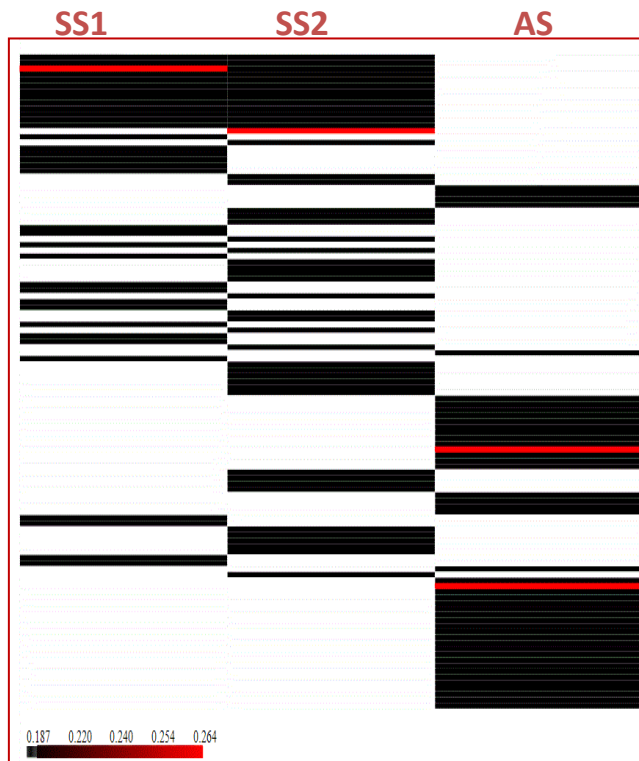

**Figure S5:** Heat map showing abundance of OTUs in (a) *cbbM*, (b) *apsA* and (c) *soxB* gene clone libraries (distance = 0.05). Each row in the heatmap represents a different OTU and the colour of the OTU in each group scaled between black and red according to the relative abundance of that OTU within the group.
