# Supplementary material for: Unravelling the Carbon and Sulphur Metabolism in Coastal Soil Ecosystems Using Comparative Cultivation-Independent Genome-Level Characterisation of Microbial Communities
Source: PubMed Central journal article supplement (PMC4167329; doi:10.1371/journal.pone.0107025), 2014-09-16
Supplement: pone.0107025.s006.pdf [file pone.0107025.s006.pdf]

**Table S1** Primer sets used for the study of microbial community structure and gene abundance

| Primer                          | Primer sequence(5'-3')                         | Targeted key enzyme      | PCR conditions*                                                                                                                           | Reference                      | Soil Samples |     |    |    |
|---------------------------------|------------------------------------------------|--------------------------|-------------------------------------------------------------------------------------------------------------------------------------------|--------------------------------|--------------|-----|----|----|
|                                 |                                                |                          |                                                                                                                                           |                                | SS1          | SS2 | AS | RS |
| <i>cbmM-f</i><br><i>cbmM-r</i>  | GGCACCATCATCAAGCCCAAG<br>TCTTGCCGTAGCCCATGGTGC | Form II RuBisCO          | 94 °C/3 min; 25 cycles of 94 °C/30 s 62 °C/30 s 72 °C/45 s;<br>10 cycles of 94 °C/20 s, 52 °C/20 s 72 °C/45 s; 72°C/ 7 min.               | Alfreider <i>et al.</i> , 2003 | +            | +   | +  | +  |
| <i>apsAF</i><br><i>apsAR</i>    | TGGCAGATMATGATYMACGG<br>GGGCCGTAACCGTCCTTGAA   | Adenosine phosphosulfate | 95°C/ 5 min; 35 cycles of 95°C/ 1 min 56°C/ 2 min 72°C 2 min;72°C/ 7 min.                                                                 | Friedrich, 2002                | +            | +   | +  | -  |
| <i>aclB-F1</i><br><i>aclB-R</i> | TGGACMATGGTDGCGYGGKGGT<br>ATAGTTKGGSCCACCTCTTC | ATP citrate lyase        | 94°C for 3 min, 37°C for 2 min, and 72°C for 3 min (2 cycles), followed by 35 cycles of 94°C for 30 s, 54°C for 30 s, and 72°C for 1 min. | Campbell <i>et al.</i> , 2003  | -            | -   | -  | -  |
| <i>soxBF</i><br><i>soxBR</i>    | ATCGGNCARGCNTTYCCNTA<br>CATGTCNCCNCCRTGYTG     | Sulfate thiohydrolase    | 94 °C/3 min; 10 cycles of 94 °C/30 s 55 °C/40 s 72 °C/30 s;<br>25 cycles of 94 °C/30 s, 47 °C/40 s 72 °C/30 s; 72°C/ 7 min.               | Meyer <i>et al.</i> , 2007     | +            | +   | +  | -  |

(+): Positive PCR amplification, (-): no PCR amplification

\*Used for normal PCR for the construction of gene libraries however, for quantitative real-time PCR (qPCR) conditions were: 95°C/5 min, 35 cycles of 95°C/ 30 sec, followed by 60°C/ 30 sec; 56°C/ 30 sec and 55°C/ 30 sec for *cbmM*, *apsA* and *soxB* genes respectively.
