# Supplementary material for: Unravelling the Carbon and Sulphur Metabolism in Coastal Soil Ecosystems Using Comparative Cultivation-Independent Genome-Level Characterisation of Microbial Communities
Source: PubMed Central journal article supplement (PMC4167329; doi:10.1371/journal.pone.0107025), 2014-09-16
Supplement: pone.0107025.s007.pdf [file pone.0107025.s007.pdf]

**Table S2 Physicochemical characteristics of soil samples**

| Site | EC (dSm <sup>-1</sup> ) | pH        | TC (%)    | TIC (%)   | TOC (%)   | TN (%)     | TS (%)      |
|------|-------------------------|-----------|-----------|-----------|-----------|------------|-------------|
| SS1  | 3.8±0.07                | 8.3±0.11  | 1.27±0.08 | 0.02±0.08 | 0.44±0.06 | 0.09±0.005 | 0.11±0.01   |
| SS2  | 7.1±0.10                | 8.0±0.14  | 1.38±0.06 | 0.78±0.06 | 0.61±0.05 | 0.09±0.006 | 0.28±0.02   |
| AS   | 0.12±0.02               | 7.09±0.17 | 2.65±0.19 | 1.6±0.19  | 1.04±0.15 | 0.14±0.006 | 0.016±0.005 |
| RS   | 0.13±0.04               | 6.9±0.08  | 1.47±0.06 | 1.01±0.06 | 0.46±0.7  | 0.17±0.01  | 0.05±0.001  |

Values are shown as Mean ± S.D. of triplicate (n=3) data sets
