# Supplementary material for: Unravelling the Carbon and Sulphur Metabolism in Coastal Soil Ecosystems Using Comparative Cultivation-Independent Genome-Level Characterisation of Microbial Communities
Source: PubMed Central journal article supplement (PMC4167329; doi:10.1371/journal.pone.0107025), 2014-09-16
Supplement: pone.0107025.s008.pdf [file pone.0107025.s008.pdf]

**Table S3** Copy no. of gene(s) determined by qPCR in soil metagenomes

| Copy no. | 16S rRNA                      | <i>cbbL</i>                    | <i>cbbM</i>                   | <i>apsA</i>                   | <i>soxB</i>                    |
|----------|-------------------------------|--------------------------------|-------------------------------|-------------------------------|--------------------------------|
| SS1      | $(2.8 \pm 0.25) \times 10^9$  | $(2.33 \pm 0.038) \times 10^7$ | $(4.00 \pm 0.10) \times 10^6$ | $(7.0 \pm 0.008) \times 10^7$ | $(7.07 \pm 0.09) \times 10^7$  |
| SS2      | $(2.62 \pm 0.04) \times 10^9$ | $(5.0 \pm 0.09) \times 10^7$   | $(6.67 \pm 0.08) \times 10^5$ | $(7.3 \pm 0.002) \times 10^6$ | $(6.66 \pm 0.15) \times 10^6$  |
| AS       | $(6.37 \pm 0.07) \times 10^9$ | $(7.33 \pm 0.08) \times 10^8$  | $(2.0 \pm 0.19) \times 10^5$  | $(3.0 \pm 0.013) \times 10^7$ | $(7.00 \pm 0.045) \times 10^7$ |
| RS       | $(7.82 \pm 0.20) \times 10^9$ | $(3.6 \pm 0.15) \times 10^8$   | $(1.67 \pm 0.09) \times 10^5$ | ND                            | ND                             |
